# Supplementary material for: Freeze–thaw repetition as an auxiliary method to promote efficient separation of hemicellulose from poplar
Source: Royal Society of Chemistry journal article supplement (doi:10.1039/c9gc03792f), 2020-01-01
Supplement: c9gc03792f1.pdf [file c9gc03792f1.pdf]

## Supplementary Information

### Freeze-thaw repetition as an auxiliary method to promote efficient separation of hemicellulose from poplar

Huixia Zhu<sup>a</sup>, Qianli Ma<sup>\*b,c</sup>, Jie Sheng<sup>a</sup>, Rendang Yang<sup>\*a</sup>

<sup>a</sup> State Key Laboratory of Pulp and Paper Engineering, South China University of Technology,

Guangzhou, CN 510640, China; E-mail: shanyue5230@126.com.

<sup>b</sup> International Centre for Bamboo and Rattan, Beijing 100102, China.

<sup>c</sup> National Forestry and Grassland Administration/Beijing Co-build Key Laboratory of Bamboo and Rattan Science

& Technology, Beijing 100102, China.

\* Correspondence: rendangyang@163.com; maql@icbr.ac.cn

Table S1 Polymeric and monomeric carbohydrates distribution of hydrolysate

| Samples         | TSE (mg/g)              | TMsE (mg/g)             | PMs (%)                 | TPsE (mg/g)             | PPs (%)                 |
|-----------------|-------------------------|-------------------------|-------------------------|-------------------------|-------------------------|
| F <sub>AT</sub> | 64.93±2.02 <sup>d</sup> | 2.78±0.16 <sup>e</sup>  | 4.30±0.040 <sup>f</sup> | 62.13±2.89 <sup>c</sup> | 95.70±0.40 <sup>a</sup> |
| F <sub>1</sub>  | 69.35±1.95 <sup>c</sup> | 3.34±0.17 <sup>d</sup>  | 4.81±0.10 <sup>f</sup>  | 66.07±2.04 <sup>b</sup> | 95.19±0.09 <sup>a</sup> |
| F <sub>2</sub>  | 75.92±0.69 <sup>b</sup> | 4.96±0.24 <sup>c</sup>  | 6.54±0.37 <sup>e</sup>  | 70.89±0.91 <sup>a</sup> | 93.46±0.37 <sup>b</sup> |
| F <sub>3</sub>  | 78.69±1.63 <sup>b</sup> | 5.87±0.20 <sup>b</sup>  | 7.47±0.41 <sup>d</sup>  | 72.77±1.83 <sup>a</sup> | 92.53±0.41 <sup>c</sup> |
| F <sub>4</sub>  | 85.88±1.53 <sup>a</sup> | 14.97±1.00 <sup>a</sup> | 17.51±1.48 <sup>c</sup> | 70.91±2.53 <sup>a</sup> | 82.47±1.48 <sup>d</sup> |
| F <sub>5</sub>  | 71.26±2.23 <sup>c</sup> | 15.04±1.14 <sup>a</sup> | 21.08±1.08 <sup>b</sup> | 56.23±2.52 <sup>d</sup> | 78.92±1.08 <sup>e</sup> |
| F <sub>6</sub>  | 54.10±1.41 <sup>e</sup> | 14.85±1.00 <sup>a</sup> | 27.40±1.18 <sup>a</sup> | 39.27±0.54 <sup>e</sup> | 72.60±1.18 <sup>f</sup> |

\*TSE: Total saccharide extraction;

TMsE: Total monosaccharide extraction;

TPsE: Total polysaccharide extraction;

PMs(%): Proportion of monosaccharides (relative to total extracted hemicellulose);

PPs(%): Proportion of polysaccharides (relative to total extracted hemicellulose);

Different superscripts in the same column indicate the significant difference ( $p < 0.05$ ), same superscripts in the same column indicate

no significant difference ( $p > 0.05$ ).
